# Supplementary material for: Carbamate thermal decarboxylation for the design of non-isocyanate polyurethane foams
Source: Royal Society of Chemistry journal article supplement (doi:10.1039/d3py00096f), 2023-01-01
Supplement: d3py00096f1.pdf [file d3py00096f1.pdf]

## Supplementary Information

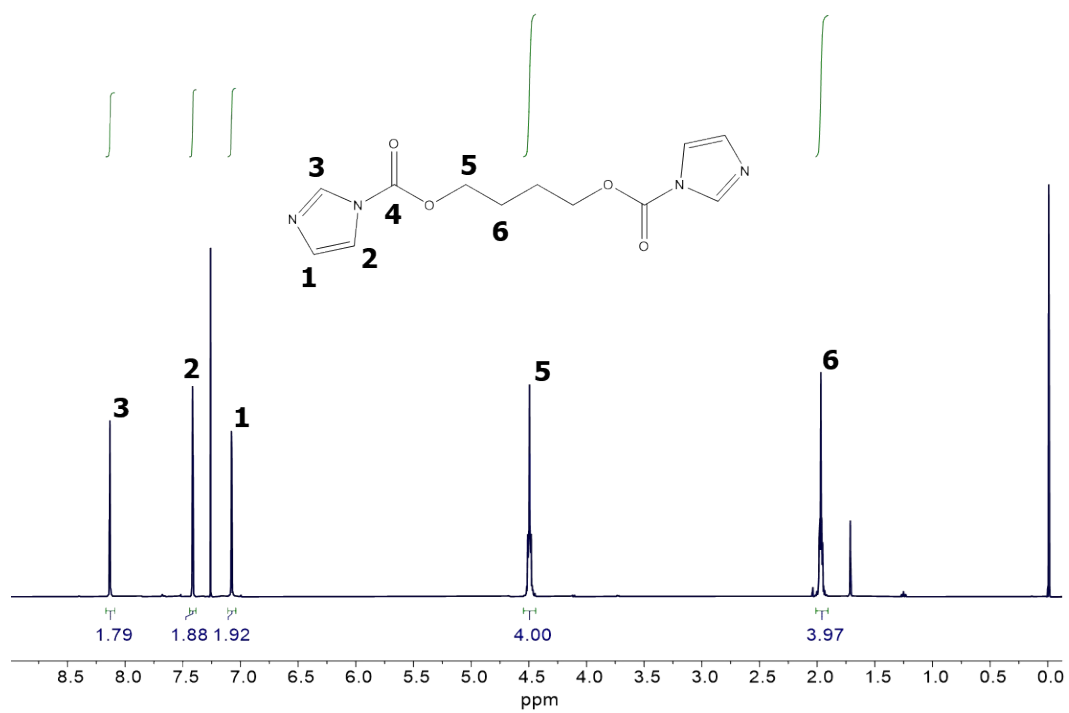

**Figure S1.** <sup>1</sup>H NMR, in CDCl<sub>3</sub>, confirmed the structure and purity of the 1,4-butyl(bis-carbonylimidazolide) (1,4-BBCI).

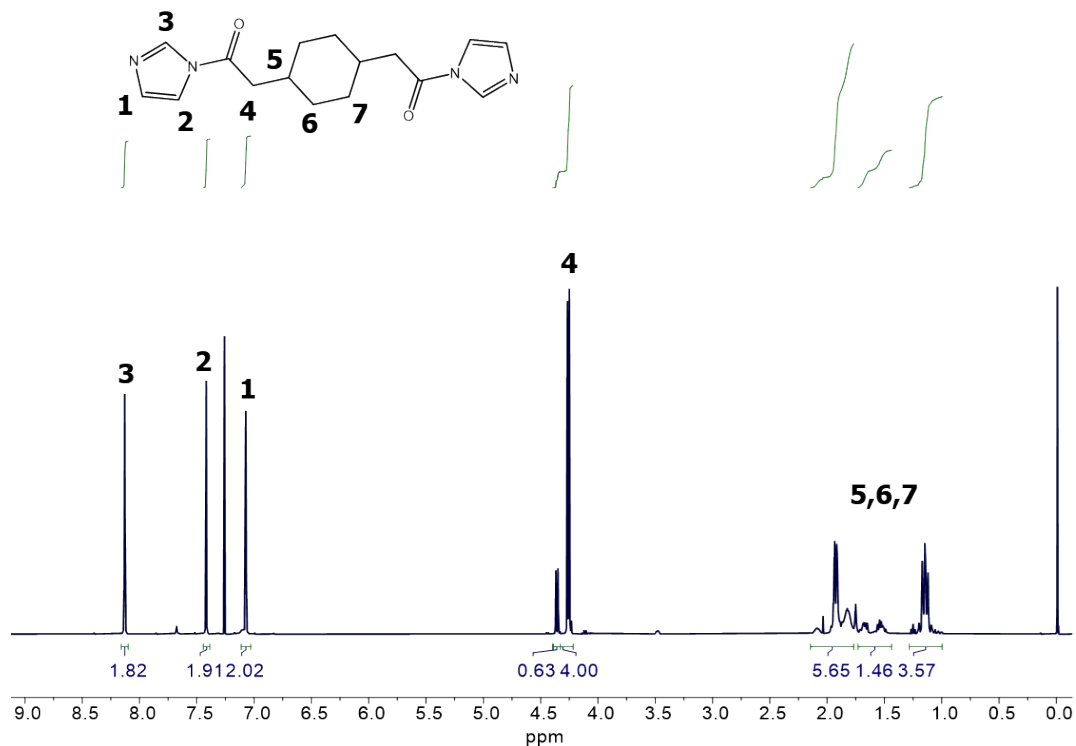

**Figure S2.**  $^1\text{H}$  NMR, in  $\text{CDCl}_3$ , confirmed the structure and purity of the 1,4-cyclohexanedimethanol(bis-carbonylimidazolide) (1,4-CHDMBCI).

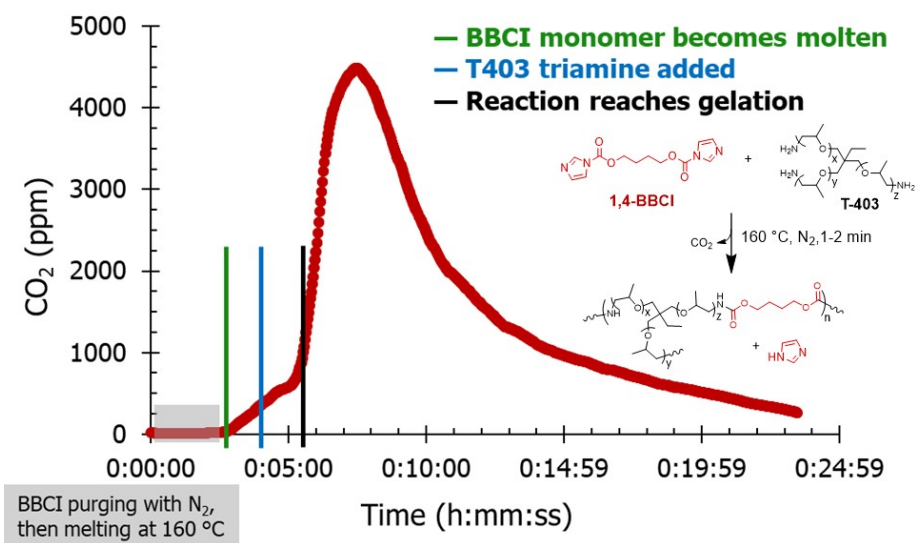

**Figure S3.**  $\text{CO}_2$  generation occurred rapidly once monomers were in the melt-state and increased exponentially upon gelation.

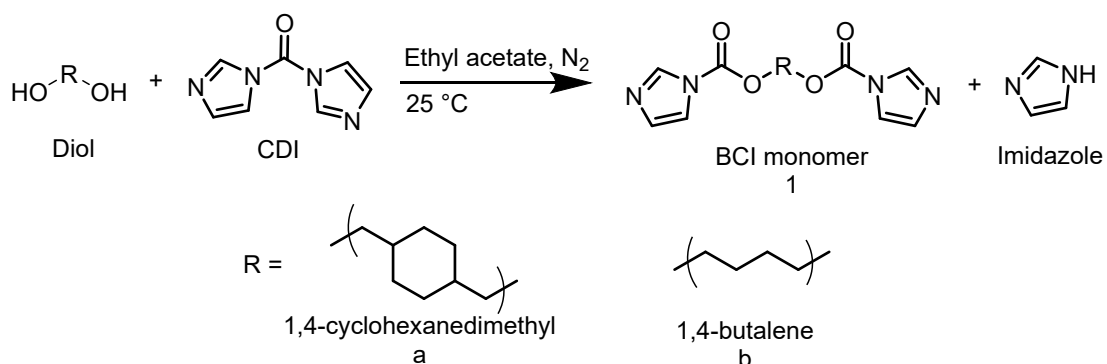

**Scheme S1.** Ethyl acetate facilitated high conversion of 1,4-butanediol, **b**, and 1,4-cyclohexanedimethanol, **a**, to 1,4-butyl(bis-carbonylimidazolide) (1,4-BBCI), **1b**, and 1,4-cyclohexanedimethyl(bis-carbonylimidazolide) (1,4-CHDMBCI), **1a**, respectively.

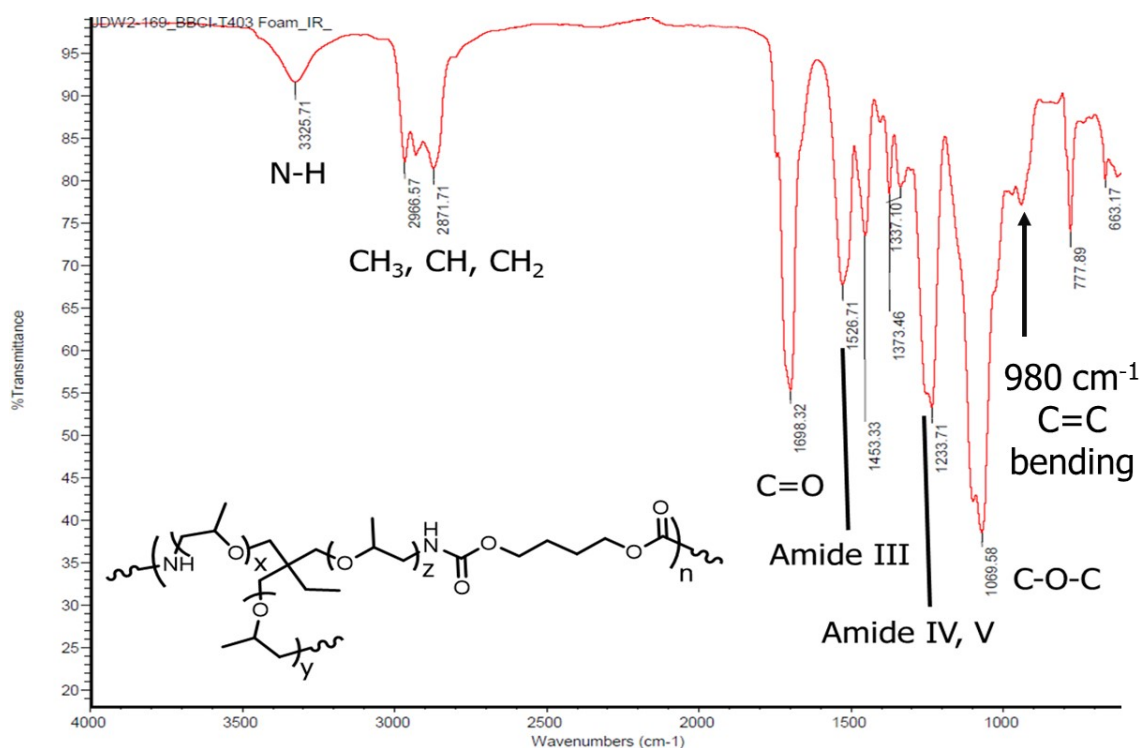

**Figure S4.** ATR-IR confirmed presence of urethane linkages and alkene moieties of PU foams.

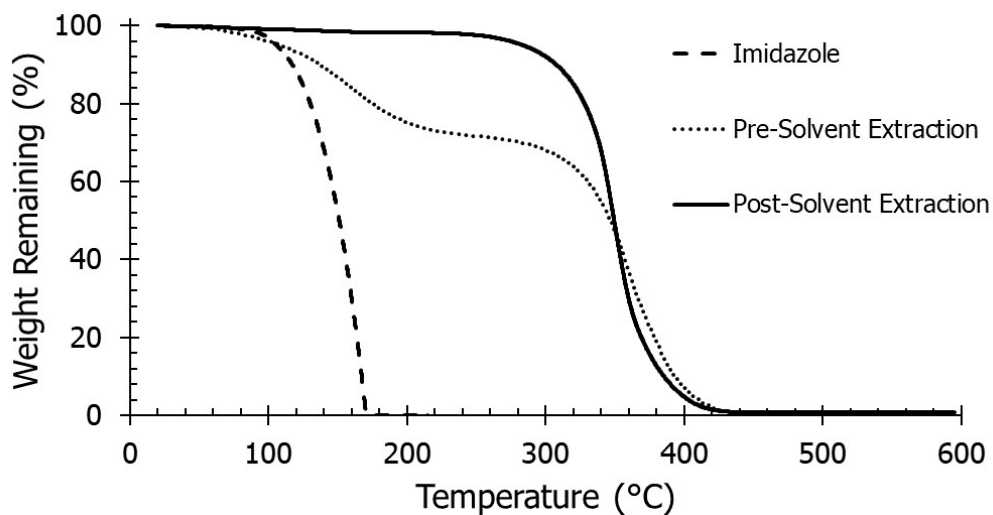

**Figure S5.** TGA temperature ramp experiment with imidazole small molecule (dashed line) and BBCI-MDA:T-403 0:100 PU foam before (dotted line) and after (solid line) solvent extraction.

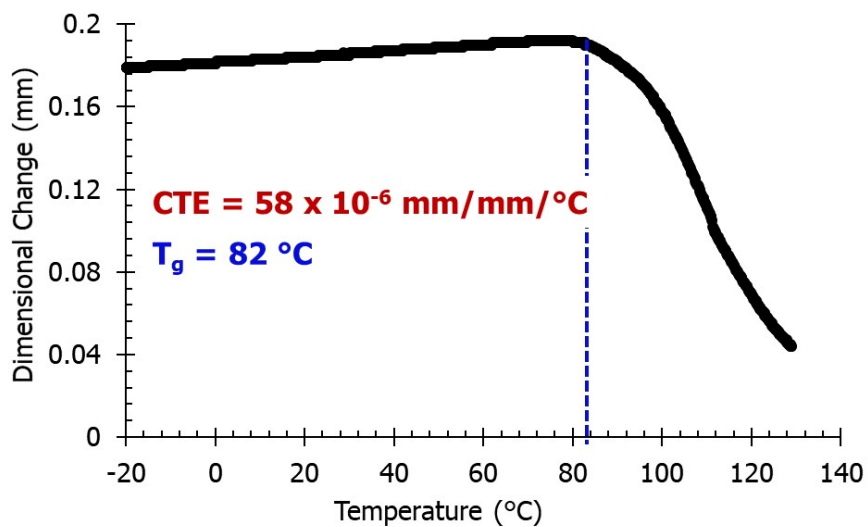

**Figure S6.** Select TMA temperature ramp of BBCI-TADE:T-403 90:10 provided CTE from slope and  $T_g$  from onset point.

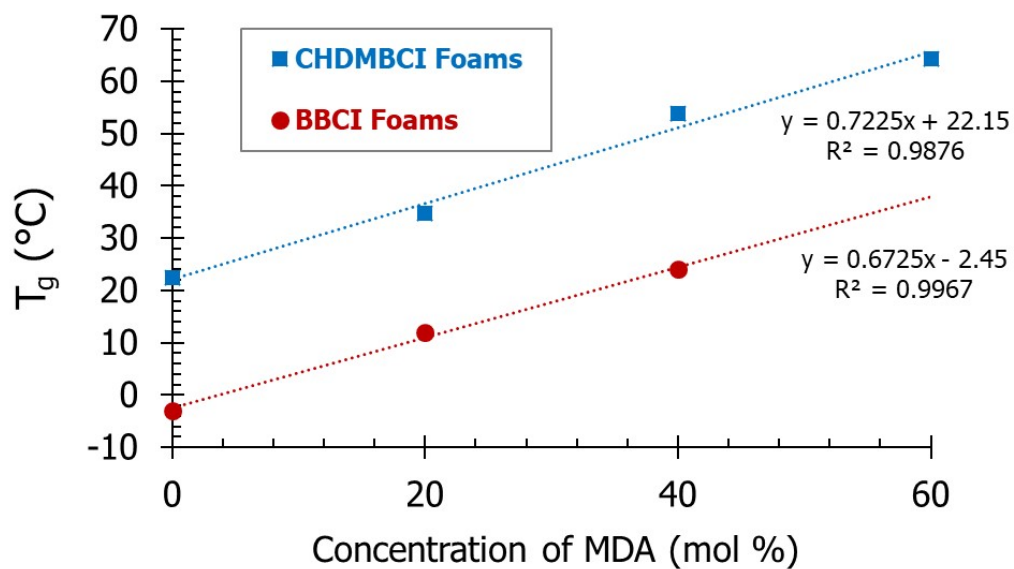

**Figure S7.** DSC analysis indicated that the addition of MDA increased the  $T_g$  of T-403-based PU foams.

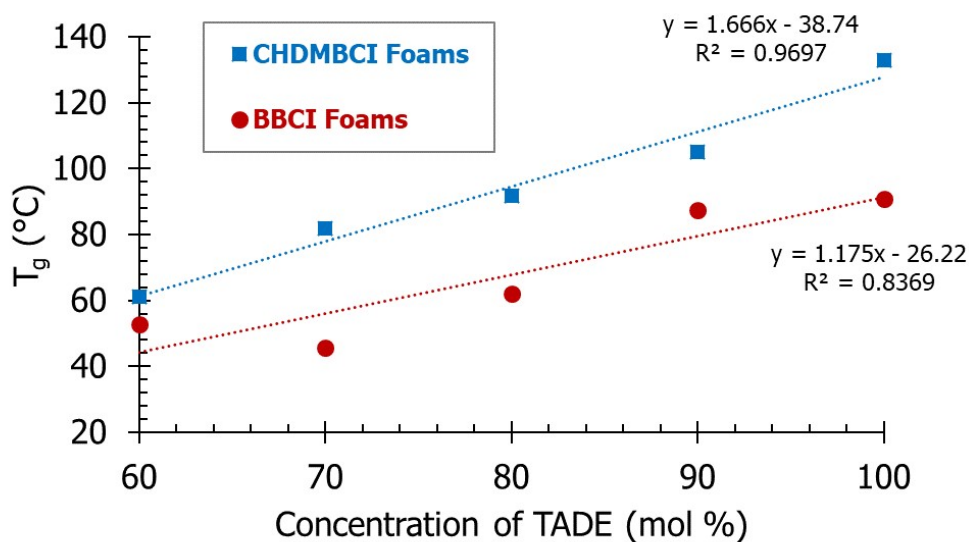

**Figure S8.** The incorporation of T-403 reduced the  $T_g$  for TADE-based PU foams according to DSC analysis.

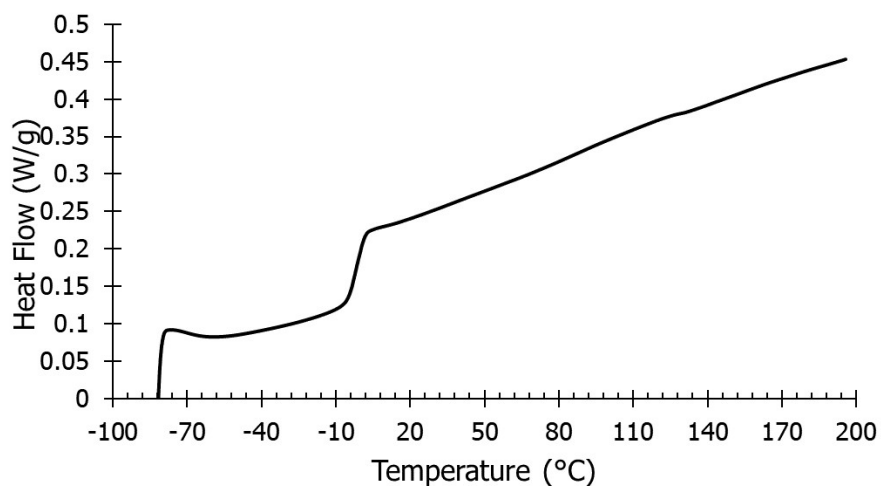

**Figure S9.** Select DSC trace of BBCI-MDA:T-403 0:100 PU foam with an observed  $T_{\text{g}}$  of -3 °C.

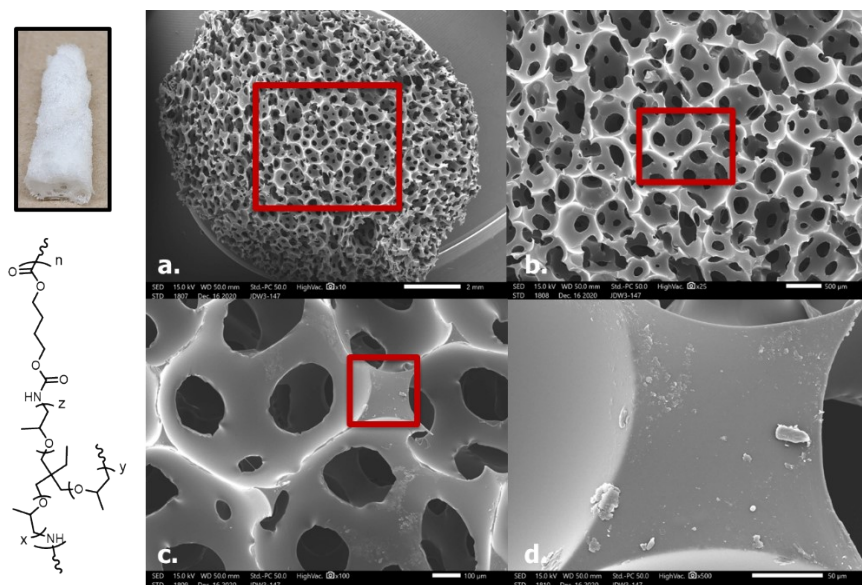

**Figure S10.** Introduction of surfactant (0.8 wt % Dabco<sup>®</sup> DC193) into BBCI-MDA:T-403 0:100 produced more open cells than without surfactant.

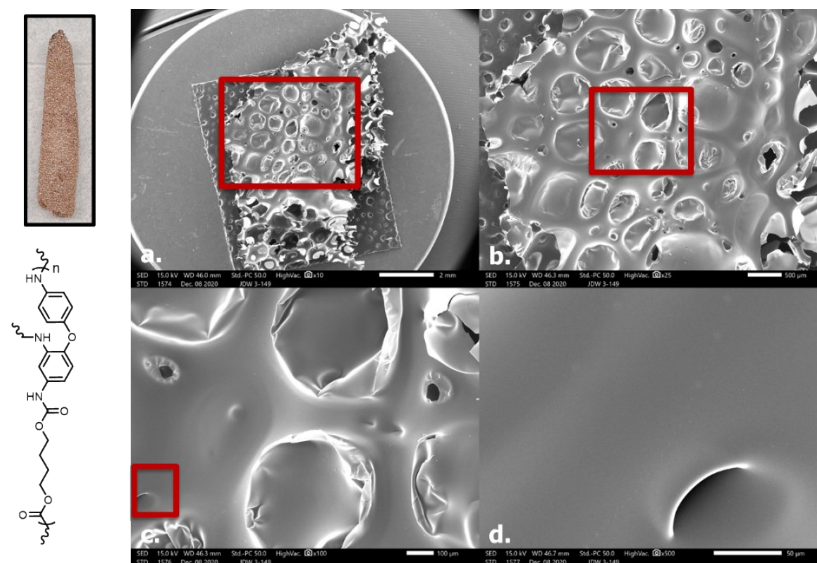

**Figure S11.** Introduction of surfactant (0.8 wt % Dabco® DC193) into BBCI-TADE:T-403 100:0 produced a more homogeneous distribution of cells than without surfactant.
